1 **Identification of antibodies targeting the H3N2 hemagglutinin receptor**  
2 **binding site following vaccination of humans**

3

4 Seth J. Zost<sup>1</sup>, Juhye Lee<sup>2,3</sup>, Megan E. Gumina<sup>1</sup>, Kaela Parkhouse<sup>1</sup>, Carole Henry<sup>4</sup>, Patrick C.  
5 Wilson<sup>4</sup>, Jesse D. Bloom<sup>2,3,5</sup>, and Scott E. Hensley<sup>1,\*</sup>

6

7 *<sup>1</sup>Department of Microbiology, Perelman School of Medicine, University of Pennsylvania,*  
8 *Philadelphia, PA, USA*

9 *<sup>2</sup>Department of Basic Sciences and Computational Biology Program, Fred Hutchinson Cancer*  
10 *Research Center, Seattle, Washington, USA*

11 *<sup>3</sup>Department of Genome Sciences, University of Washington, Seattle, Washington, USA*

12 *<sup>4</sup>Department of Medicine, Section of Rheumatology, the Knapp Center for Lupus and*  
13 *Immunology, University of Chicago, Chicago, Illinois, USA*

14 *<sup>5</sup>Howard Hughes Medical Institute, Seattle, Washington, USA*

15

16

17

18

19 Running Title: Human H3N2 HA RBS-targeting antibodies

20 Abstract word count: 136

21 Text word count: 5424

22

23

24 \*Correspondence: [hensley@pennmedicine.upenn.edu](mailto:hensley@pennmedicine.upenn.edu)

25 **SUMMARY**

26 Antibodies targeting the receptor binding site (RBS) of the influenza virus hemagglutinin (HA)  
27 protein are usually not broadly-reactive because their footprints are typically large and extend to  
28 nearby variable HA residues. Here, we identified several human H3N2 HA RBS-targeting  
29 monoclonal antibodies (mAbs) that were sensitive to substitutions in conventional antigenic sites  
30 and were not broadly-reactive. However, we also identified one H3N2 HA RBS-targeting mAb  
31 that was exceptionally broadly reactive despite being sensitive to substitutions in residues  
32 outside of the RBS. We determined that similar antibodies are present at measurable levels in  
33 the sera of some individuals but that they are inefficiently elicited by conventional vaccines. Our  
34 data indicate that some HA RBS-targeting antibodies can be surprisingly effective against  
35 variable viral strains even if they are somewhat sensitive to substitutions in HA residues  
36 adjacent to the RBS.

37

38

## 39 INTRODUCTION

40 Influenza viruses continuously infect humans, in large part due to their ability to rapidly  
41 escape human immunity (Yewdell, 2011). Most neutralizing antibodies against influenza viruses  
42 target the globular head domains of hemagglutinin (HA) proteins and inhibit viral replication by  
43 blocking viral attachment. These types of antibodies often become ineffective after viruses  
44 acquire substitutions in epitopes within the HA globular head through a process called antigenic  
45 drift. As a result, seasonal influenza virus infections or vaccinations typically provide limited  
46 protection against antigenically drifted strains. New 'universal' vaccine antigens are currently  
47 being developed to elicit broadly-reactive antibodies against conserved epitopes in the HA  
48 receptor binding site (RBS) (Giles and Ross, 2011; Kanekiyo et al., 2019) as well as the HA  
49 stalk region (Impagliazzo et al., 2015; Krammer et al., 2013; Yassine et al., 2015).

50 New 'universal' vaccines that elicit antibodies against conserved epitopes in the HA RBS  
51 are attractive since antibodies against this region of HA directly block viral attachment and are  
52 highly neutralizing (Krause et al., 2011; Whittle et al., 2011). However, it is difficult to design  
53 appropriate vaccine antigens to elicit broadly neutralizing HA RBS-reactive antibodies because  
54 the surface area of most antibody footprints is larger than the narrow conserved RBS (Knossow  
55 and Skehel, 2006). The HA RBS is approximately  $800 \text{ \AA}^2$  (Weis et al., 1988) whereas most  
56 antibody footprints are  $1200\text{-}1500 \text{ \AA}^2$  (Amit et al., 1986).

57 Several broadly neutralizing antibodies that target conserved residues in the HA RBS  
58 have been identified (Ekiert et al., 2012; Krause et al., 2011; Lee et al., 2014; Lee et al., 2012;  
59 McCarthy et al., 2018; Schmidt et al., 2015b; Tsibane et al., 2012; Whittle et al., 2011; Winarski  
60 et al., 2015; Xu et al., 2013). These antibodies can arise from a number of  $V_H$  gene segments  
61 (McCarthy et al., 2018; Schmidt et al., 2015b). Most of these HA RBS-targeting antibodies bind  
62 through molecular mimicry, imitating the HA cellular receptor, sialic acid. Some of these broadly  
63 reactive antibodies make contact with conserved RBS residues through a shared dipeptide motif  
64 (Krause et al., 2011; Schmidt et al., 2015b; Whittle et al., 2011), while other antibodies insert a

65 hydrophobic residue into the RBS (Xu et al., 2013). Most broadly reactive HA RBS-targeting  
66 antibodies possess atypically long HCDRs that allow the sialic acid-mimic motif of the antibody  
67 to guide into the conserved RBS while minimizing critical contacts to variable residues on the  
68 rim of the RBS (Ekiert et al., 2012; Lee et al., 2014; Whittle et al., 2011; Xu et al., 2013).

69 Here, we characterized the binding and neutralization characteristics of a large panel of  
70 anti-H3 human monoclonal antibodies (mAbs) that were isolated following seasonal influenza  
71 vaccination. Surprisingly, we found that a large proportion (>25%) of these mAbs targeted  
72 epitopes in the HA RBS. While most of these HA RBS-targeting mAbs were sensitive to  
73 substitutions in adjacent antigenic sites and were not broadly-reactive, we identified one mAb  
74 that maintained broad reactivity despite being moderately sensitive to substitutions at residues  
75 inside and outside of the RBS. We completed a series of experiments to further characterize  
76 this mAb and we determined that some individuals possess high levels of similar antibodies in  
77 polyclonal sera. These studies suggest that HA RBS antibodies are routinely elicited by  
78 vaccination and that some of these antibodies can be broadly reactive despite being sensitive to  
79 variation in residues adjacent to the conserved RBS.

80

## 81 **RESULTS**

### 82 **Most vaccine-elicited human H3 mAbs target epitopes in HA globular head domain**

83 We characterized 33 anti-H3 human mAbs that were isolated from 13 individuals  
84 vaccinated with the 2010-2011 trivalent seasonal influenza vaccine. First, we completed  
85 hemagglutination-inhibition (HAI) and micro-neutralization (MN) assays with the H3N2  
86 component of the 2010-2011 vaccine, A/Victoria/210/2009, to determine if the mAbs prevent  
87 receptor binding and/or block virus infection *in vitro*. Twenty six out of 33 mAbs inhibited  
88 agglutination of the vaccine strain (Figure 1A), indicating that they likely targeted epitopes in the  
89 HA globular head domain. All HAI+ mAbs also neutralized the A/Victoria/210/2009 strain *in vitro*  
90 (Figure 1B). We identified 7 HAI- mAbs (Figure 1A), and we found that 2 of these mAbs

91 neutralized virus *in vitro* while the remaining 5 were non-neutralizing (Figure 1B). Several HAI-  
92 mAbs inhibited binding of the HA stalk-reactive F49 mAb in competition assays (Supplemental  
93 Figure 1), suggesting that these mAbs targeted epitopes in lower regions of HA. These data are  
94 consistent with previous studies (Angeletti and Yewdell, 2018) that suggest that the majority of  
95 antibodies elicited by seasonal influenza vaccines target neutralizing epitopes on the HA  
96 globular head.

97

### 98 **Most vaccine-elicited human H3 mAbs target HA antigenic site B**

99 To map the footprints of each mAb, we measured binding to a panel of  
100 A/Victoria/210/2009 HAs that possessed different amino acid substitutions. For this, we created  
101 virus-like particles (VLPs) with A/Victoria/210/2009 HAs that possessed substitutions in classical  
102 antigenic sites (Koel et al., 2013; Wiley et al., 1981) and antigenic sites that have recently  
103 changed in naturally circulating human viral strains (Hadfield et al., 2018). Most of the  
104 substitutions in our panel were located in antigenic site A and B near the HA receptor binding  
105 site, but we also included several substitutions in epitopes in the lower part of HA head (Figure  
106 2A). We also included HAs with substitutions in conserved residues within the RBS (Figure 2A),  
107 so that we could identify HA RBS-targeting mAbs. In total, we tested binding of all 33 mAbs  
108 using a panel of VLPs that expressed 25 different HAs in ELISAs (Figure 2B).

109 The majority (73%) of HAI+ mAbs in our panel were sensitive to substitutions in HA  
110 antigenic site B. Mutations at residues 157, 159 and 160 of HA antigenic site B abrogated the  
111 binding of ~61% of HAI+ mAbs, whereas substitutions at other antigenic site B residues (155,  
112 156, 189, 192, 193) affected the binding of fewer mAbs. We identified several mAbs that were  
113 sensitive to substitutions in antigenic site A or epitopes lower on HA that were further from the  
114 receptor binding site. Only 3 mAbs in our panel were sensitive to substitutions in antigenic site A  
115 and 7 mAbs were sensitive to substitutions in residues lower on HA. These data suggest that  
116 antigenic site B is the major target of human neutralizing HA antibodies and demonstrate that

117 single mutations near the RBS can abrogate the binding of most human mAbs.

118 While our data indicating that most of the mAbs in our panel are HA site B-specific are  
119 consistent with previous studies (Chambers et al., 2015; Popova et al., 2012; Zost et al., 2017),  
120 we were surprised to find that ~1/3 of our HAI+ mAbs were sensitive to substitutions in  
121 conserved positions in the HA RBS (Figure 2B). Most of the mAbs in our panel that were  
122 sensitive to RBS mutations were also sensitive to site B mutations (Figure 2B). However,  
123 several mAbs that targeted the RBS were only moderately affected by site B mutations. For  
124 example, the 019-10117-3C06 mAb, which was moderately sensitive to RBS and site B  
125 substitutions, maintained partial binding to all of the mutant HAs that we tested. These data  
126 reveal that seasonal influenza vaccines unexpectedly elicit robust antibody responses targeting  
127 conserved residues within the HA RBS and that at least some of these antibodies can maintain  
128 partial binding to HAs that possess substitutions in conventional antigenic sites adjacent to the  
129 RBS.

130

### 131 **Identification of a HA RBS-targeting mAb with exceptional breadth**

132 To assess the breadth of each mAb, we measured binding to HAs from H3N2 viruses  
133 isolated prior to and after the 2010-2011 season. As expected, most HAI- mAbs bound broadly  
134 to H3s isolated from 1968-2014 and two HAI- mAbs bound to both H3s and H1 (Figure. 3). In  
135 contrast, the majority of HAI+ mAbs bound to a narrow range of HAs from viruses that circulated  
136 from 2005-2012 (Figure 3). Most HAI+ mAbs failed to recognize an HA from a recent 2014  
137 clade 3C.2a H3N2 strain (Chambers et al., 2015; Zost et al., 2017) that possesses an  
138 antigenically novel HA antigenic site B (Figure 3). Interestingly, 2 HAI+ mAbs (019-10117-3C06  
139 and 028-10134-4F03) had exceptionally broad reactivity, binding to every H3 in our panel. One  
140 of these mAbs (028-10134-4F03) was sensitive to substitutions in residues 121 and 150 (Figure  
141 2B) in the lower region of HA (Figure 2A). The second broadly reactive HAI+ mAb (019-10117-  
142 3C06) is particularly interesting because it is one of the HA RBS-targeting mAbs that we

143 determined to be only moderately sensitive to substitutions in classic antigenic site B residues  
144 (Figure 2B). Despite having moderate reductions in binding to HAs with antigenic site B  
145 substitutions and RBS substitutions, the 019-10117-3C06 mAb maintained partial binding to  
146 every H3 in our panel, including the antigenically advanced 2014 clade 3C2.a H3N2 strain  
147 (Figure 3). The 019-10117-3C06 mAb originates from the IGHV1-69 germline and possesses a  
148 19 amino acid HCDR3. The 019-10117-3C06 mAb also possesses a J<sub>H</sub>6 gene segment which  
149 has been previously reported as a common feature of mAbs recognizing the H1 RBS (Schmidt  
150 et al., 2015b).

151

### 152 **Characterization of a broadly reactive HA RBS-targeting mAb**

153 We next completed a series of studies to further characterize the broadly reactive HA  
154 RBS-targeting 019-10117-3C06 mAb. First, we used a deep mutational scanning approach  
155 (Doud et al., 2017; Doud et al., 2018; Lee et al., 2018) to unbiasedly identify HA amino acid  
156 substitutions that could facilitate viral escape from this mAb. For these experiments we used a  
157 library of A/Perth/16/2009 HAs (which is antigenically similar to A/Victoria/210/2009) that  
158 possessed every possible single amino-acid substitution in HA and then we grew this virus  
159 library in the presence or absence of the 019-10117-3C06 mAb. For comparison, we completed  
160 parallel experiments where we grew the virus library in the presence of an HA antigenic site B  
161 mAb (024-10128-3C04) that did not have broad reactivity. As expected, the narrowly-reactive  
162 024-10128-3C04 HA site B mAb selected viruses with substitutions in residues 159, 160, 192,  
163 and 193, which are located in HA antigenic site B (Figure 4A). Interestingly, the broadly reactive  
164 019-10117-3C06 mAb also selected for viruses with HAs that possessed substitutions in  
165 antigenic site B (residues 159, 160, 193), as well as HAs that possessed substitutions in the  
166 adjacent antigenic site A (residue 145) (Figure 4B).

167 In order to further characterize HA amino-acid substitutions identified in our deep  
168 mutational scanning experiments, we completed neutralization assays using viruses engineered

169 to express A/Perth/16/2009 HAs with the N145D, F159G, F159S, K160T, or I192E substitutions.  
170 As expected, site B substitutions dramatically reduced neutralization of the narrowly-reactive  
171 024-10128-3C04 mAb (Figure 4C). Substitutions at residues 145, 159, and 160 also reduced  
172 neutralization of the 019-10117-3C06 mAb, but importantly, all mutant viruses tested were still  
173 moderately neutralized by this mAb (Figure 4D). As a control, we also tested binding of the 028-  
174 10134-4F03 mAb, which binds lower on the HA head, against the 024-10128-3C04 and 019-  
175 10117-3C06 escape mutants. As expected, this mAb neutralized these mutants equivalently  
176 (Figure 4E). These data indicate that viruses can acquire HA substitutions that decrease  
177 neutralization of the broadly reactive 019-10117-3C06 mAb but that these substitutions do not  
178 completely escape from this antibody.

179 We hypothesized that the 019-10117-3C06 mAb is able to partially recognize viruses  
180 with HA antigenic site B substitutions by engaging conserved residues in the HA RBS. To test  
181 this hypothesis, we measured antibody binding to HAs that possessed a K160T HA substitution  
182 that introduces a glycosylation site in HA antigenic site B (Zost et al., 2017) with and without an  
183 additional Y98F substitution. HA residue 98 is located at the base of the RBS and interacts  
184 directly with sialic acid (Figure 2 and (Whittle et al., 2014)). Previous studies have shown that  
185 the Y98F substitution prevents HA binding to sialic acid without affecting the overall structure of  
186 HA (Bradley et al., 2011; Martín et al., 1998; Whittle et al., 2014). Consistent with our previous  
187 analyses (Figure 2), the 019-10117-3C06 mAb had moderate reductions in binding to HAs  
188 possessing either the K160T or the Y98F HA substitutions (Figure. 5A). Importantly, the 019-  
189 10117-3C06 mAb had dramatically reduced binding to HAs possessing both of these mutations  
190 (Figure 5A). As a control, we also tested binding of the narrow 024-10128-3C04 mAb to HAs  
191 possessing the K160T substitution with or without the Y98F substitution. Unlike the broadly  
192 reactive 019-10117-3C06 mAb, the narrow 024-10128-3C04 mAb failed to efficiently bind to  
193 HAs possessing K160T, with or without the Y98F substitution (Figure 5B). This suggests that  
194 partial binding of the 019-10117-3C06 mAb to HAs with antigenic site B substitutions is



195 dependent on interactions with conserved residues in the RBS.

196

### 197 **Some individuals possess high levels of broadly-reactive HA RBS-targeting antibodies**

198 We completed ELISAs to determine if HA RBS-targeting antibodies were present at high  
199 frequencies in the sera of donors pre- and post-vaccination. We tested sera from 28 individuals  
200 vaccinated during the 2010-2011 season, including 10 of the 13 donors that were used to  
201 generate mAbs. We tested sera antibody binding to ELISAs coated with A/Victoria/210/2009  
202 HA, A/Victoria/210/2009 HA with a Y98F RBS substitution, A/Hong Kong/4801/2014 HA (a  
203 drifted strain with HA antigenic site B mutations), and A/Hong Kong/4801/2014 HA with a Y98F  
204 RBS substitution. Most sera samples did not have reduced antibody reactivity to HAs that were  
205 engineered to express the Y98F HA substitution, suggesting that the majority of antibodies in  
206 the serum of these vaccinated individuals were not directed against conserved residues of the  
207 RBS. However, serum antibodies from one donor (019-10117) had dramatically reduced binding  
208 to HAs with the Y98F substitution (Figure 6). Notably, the broadly reactive 019-10117-3C06 HA  
209 RBS-targeting mAb was derived from this same donor. This donor possessed Y98F-sensitive  
210 antibodies both prior to and after vaccination (Figure 6). Just like the 019-10117-3C06 mAb,  
211 polyclonal serum antibodies from this donor partially bound to the drifted A/Hong  
212 Kong/4801/2014 HA and binding of these antibodies was reduced by the Y98F HA substitution.

213

### 214 **HA RBS-targeting antibodies are likely important in years with seasonal influenza** 215 **vaccine mismatches**

216 It is possible that HA RBS-directed antibodies are an important part of polyclonal  
217 neutralizing antibody responses during influenza seasons in which there are large antigenic  
218 mismatches between vaccine strains and circulating strains. It has been historically difficult to  
219 quantify levels of neutralizing HA RBS-directed antibodies in polyclonal sera. The main problem  
220 is that neutralization assays cannot be completed with HAs that have RBS substitutions since

221 these substitutions often abrogate HA-sialic acid binding. To circumvent this problem, we  
222 developed an absorption-based approach to fractionate human serum samples. For these  
223 assays, we incubated serum antibodies with 293F cells expressing HAs with or without the  
224 Y98F substitution and then we completed *in vitro* neutralization assays with HA-absorbed serum  
225 fractions. In these assays, antibodies that are sensitive to the Y98F HA substitution are not  
226 absorbed by 293F cells that express the Y98F HA.

227         As a proof of principle, we first tested the broadly-reactive 019-10117-3C06 HA RBS-  
228 targeting mAb in this assay. We also included the broadly-reactive 041-10047-1C04 mAb that  
229 does not make contact with the HA RBS. For these experiments we tested binding and  
230 neutralization of the antigenically advanced A/Hong Kong/4801/2014 viral strain. Absorptions  
231 with 293F cells expressing the wild-type A/Hong Kong/4801/2014 HA completely removed both  
232 antibodies (Figure 7A). Conversely, absorptions with 293F cells expressing A/Hong  
233 Kong/4801/2014 HA with the Y98F substitution removed the control 041-10047-1C04 mAb but  
234 did not remove the HA RBS-targeting 019-10117-3C06 mAb (Figure 7A).

235         We next characterized serum antibodies in 21 individuals that received the 2015-2016  
236 seasonal vaccine. We studied antibody responses elicited against the 2015-2016 vaccine  
237 because the H3N2 component of this vaccine was severely mismatched compared to A/Hong  
238 Kong/2014-like H3N2 viruses that circulated that season (Figure 7B). We first completed  
239 standard neutralization assays using the A/Switzerland/9715293/2013 vaccine strain and the  
240 antigenically distinct A/Hong Kong/4801/2014 virus. As expected, vaccine-elicited antibodies did  
241 not neutralize the mismatched A/Hong Kong/4801/2014 virus as efficiently as the  
242 A/Switzerland/9715293/2013 vaccine strain (Figure 7C). However, the  
243 A/Switzerland/9715293/2013 vaccine strain did boost serum antibody responses against  
244 A/Hong Kong/4801/2014 in some individuals. In order to determine if these cross-reactive  
245 antibodies were targeting conserved residues of the HA RBS, we completed absorption  
246 fractionation assays using serum from the same 21 vaccinated donors. For these experiments,

247 we quantified the fraction of A/Hong Kong/4801/2014-reactive antibodies that were sensitive to  
248 the HA Y98F substitution. We detected Y98F HA-sensitive A/Hong Kong/4801/2014-reactive  
249 antibodies in 4 of 21 vaccinated donors (Figure 7D-G). We found that absorption with A/Hong  
250 Kong/4801/2014 WT HA depleted serum neutralizing antibodies, while absorption with A/Hong  
251 Kong/4801/2014HA-Y98F left an absorption-resistant fraction of neutralizing antibodies.  
252 Interestingly, some of these individuals had detectable RBS-targeting antibodies present prior to  
253 vaccination (Figure 7D,F,G). ELISA quantification confirmed that the antibodies left following  
254 A/Hong Kong/4801/2014HA-Y98F absorption bound to the A/Hong Kong/4801/2014 WT but not  
255 to the A/Hong Kong/4801/2014HA-Y98F HA, which indicates that this absorption-resistant  
256 fraction contained RBS-targeting antibodies (Supplemental Figure 2). These data suggest that  
257 cross-reactive HA RBS antibodies can be elicited by antigenically mismatched vaccines in some  
258 individuals, although this is not common with current egg-based vaccine formulations.

259

## 260 **DISCUSSION**

261 A greater understanding of the specificity of anti-influenza virus antibody responses in  
262 humans is useful for rationally designing new universal influenza vaccine antigens. We began  
263 this study by antigenically characterizing 33 H3 mAbs isolated from humans receiving a seasonal  
264 influenza vaccine. We found that the majority of these mAbs targeted epitopes in variable  
265 regions of the HA head. Some of these mAbs targeted conserved residues in the HA RBS but  
266 were not broadly reactive since they were also highly sensitive to HA substitutions in adjacent  
267 variable antigenic sites. However, we identified one HA RBS-targeting mAb that had exceptional  
268 breadth. This mAb (019-10117-3C06) was also moderately sensitive to HA substitutions in  
269 adjacent variable antigenic sites but was able to partially bind to antigenically drifted HAs.

270 Most HA RBS-targeting antibodies are not broadly reactive because their large binding  
271 footprints require contacts outside of the narrow RBS. However, several broadly reactive HA  
272 RBS-targeting antibodies have been identified (Ekiert et al., 2012; Krause et al., 2011; Lee et

273 al., 2014; Lee et al., 2012; McCarthy et al., 2018; Schmidt et al., 2015b; Tsibane et al., 2012;  
274 Whittle et al., 2011; Winarski et al., 2015; Xu et al., 2013). A common feature of these broadly  
275 reactive HA RBS-targeting antibodies is that they all have relatively long HCDR3s, which allow  
276 them to minimize contacts on the rim of the RBS and maximize contacts with conserved RBS  
277 residues. Our study highlights that HA RBS-targeting antibodies can be broadly reactive even if  
278 they are moderately sensitive to substitutions in conventional antigenic sites near the RBS. The  
279 019-10117-3C06 mAb from our study is clearly affected by substitutions in HA antigenic site B  
280 (Figure 2), but this antibody maintains binding to diverse H3 HAs (Figure 3) likely through  
281 multiple contacts with conserved residues in the RBS, which is facilitated by the antibody's 19  
282 amino acid HCDR3.

283 Our studies indicate that current vaccines do not efficiently elicit broadly reactive HA  
284 RBS-targeting antibodies in most individuals. We examined a cohort that received an  
285 antigenically mismatched vaccine, and although some of the donors mounted a cross-reactive  
286 antibody response, most of these cross-reactive antibodies were not binding to conserved  
287 residues in the HA RBS. Most conventional vaccine antigens are prepared in fertilized chicken  
288 eggs (Grohskopf et al., 2018) and contemporary egg-adapted H3N2 vaccine strains possess  
289 substitutions in or near the RBS which allow more efficient viral growth in chicken eggs (Wu et  
290 al., 2017; Zost et al., 2017). We speculate that vaccines that do not have adaptive mutations in  
291 the HA RBS might be better at eliciting antibodies targeting epitopes in the HA RBS of  
292 circulating viral strains. Future studies should determine if vaccine antigens that are not  
293 prepared in eggs are better able to elicit broadly reactive HA RBS-targeting antibodies.

294 The challenge, of course, is designing new vaccine antigens that are able to  
295 preferentially elicit antibodies like 019-10117-3C06. Recent work has sought to selectively elicit  
296 broadly-reactive HA head antibody responses through the use of "mosaic" nanoparticles that  
297 display antigenically diverse HA RBS domains on the same nanoparticle (Kanekiyo et al., 2019).  
298 This vaccination strategy might selectively activate naïve B cells targeting the HA RBS and

299 might also selectively recall broadly-reactive memory B cells in secondary responses. One key  
300 challenge moving forward will to be determine if unique prior exposure histories facilitate the  
301 development of broadly reactive HA RBS-targeting antibodies. In our study, we identified some  
302 donors with very high levels of these antibodies in polyclonal sera. In the case of donor 019-  
303 10117, these antibodies were already at high levels in polyclonal sera prior to vaccination. Is  
304 there something genetically unique about donor 019-10117 or does that donor have a unique  
305 exposure history that gave rise to a B cell response highly focused on conserved residues within  
306 the HA RBS? While some studies have generated unmutated common ancestors and inferred  
307 the immunogenic stimuli for broadly-reactive antibody lineages targeting the HA RBS (McCarthy  
308 et al., 2018; Schmidt et al., 2015a), we know little about how prior immune history and repeated  
309 exposures influence the development of HA RBS antibodies. In the field of HIV, major efforts  
310 have been made to study antibody-virus co-evolution and the development of broadly  
311 neutralizing antibody specificities in chronically infected individuals, with the goal of identifying  
312 HIV envelope proteins that favor the development of broadly neutralizing antibody responses  
313 (Bonsignori et al., 2017; Landais et al., 2017; Rantalainen et al., 2018). Longitudinal studies in  
314 human cohorts could address similar questions for influenza viruses, with the potential to fill in  
315 gaps in our understanding of how antibody responses are elicited, recalled, and altered by  
316 infection and vaccination (Erbelding et al., 2018).

317

## 318 **ACKNOWLEDGMENTS**

319 This work was supported by the National Institute of Allergy and Infectious Diseases  
320 (1R01AI113047, SEH; 1R01AI108686, SEH; CEIRS HHSN272201400005C, PCW, JDB, and  
321 SEH). Jesse D. Bloom and Scott E. Hensley hold an Investigators in the Pathogenesis of  
322 Infectious Disease Awards from the Burroughs Wellcome Fund.

323

## 324 **AUTHOR CONTRIBUTIONS**

325 SJZ, JL, MEG, and KP completed experiments and analyzed data. CH and PCW provided  
326 plasmids that express heavy and light chains of each mAb in this study. JDB supervised  
327 mutational scanning experiments. SEH conceived the project, supervised the project, and  
328 analyzed data. SJZ and SEH wrote the manuscript with input from all authors.

329

### 330 **DECLARATION OF INTERESTS**

331 SEH reports receiving consulting fees from Sanofi Pasteur, Lumen, Novavax, and Merck. All other  
332 authors report no potential conflicts.

333

### 334 **FIGURE LEGENDS**

#### 335 **Figure 1: Hemagglutination-Inhibition and Micro-Neutralization Activities of mAbs**

336 (A) Hemagglutination inhibition assays and (B) micro-neutralization assays were completed with  
337 each mAb and the A/Victoria/210/2009 vaccine strain. Titers shown are representative of two  
338 independent experiments.

339

#### 340 **Figure 2: Antigenic Fine-Mapping of mAbs**

341 Each mAb was tested for binding to a panel of HAs with different substitutions. (A) The location  
342 of each HA substitution tested is shown on the H3 structure. Most substitutions did not affect  
343 glycosylation, with the exception of the K160T substitution that results in the addition of a glycan  
344 at N158 (shown in red) and the N285Y substitution that results in the loss of a glycan (shown in  
345 orange). (B) ELISAs were completed using plates coated with VLPs bearing WT HA and HAs  
346 with different substitutions. Numbers in squares indicate fraction of binding relative to VLPs with  
347 A/Victoria/210/2009 WT HA. Colors of each square range from white (0% of binding to WT) to  
348 black (100% of binding to WT). Binding values are the average of two independent experiments.

349

#### 350 **Figure 3: Binding of mAbs to Historical H3N2 Strains**

351 ELISAs were completed with each mAb and a panel of historical H3N2 strains. Colors of each  
352 square range from white (0% of binding to WT) to black (100% of binding to WT). Binding  
353 values are the average of two independent experiments, while the value in each square  
354 indicates the fraction of binding relative to the A/Victoria/210/2009 vaccine strain.

355

#### 356 **Figure 4: Mutational Antigenic Profiling of mAbs Targeting Antigenic Site B and the RBS**

357 Deep mutational scanning experiments were completed to identify resistant viral fractions that  
358 survived after mAb selection. Logo plots showing the selection of amino acid substitutions and  
359 locations of these substitutions on the HA structure are shown after selection with the 024-10128-  
360 3C04 mAb (A) and the 019-10117-3C06 mAb. Neutralization assays were completed with  
361 viruses that possessed several of the substitutions identified in deep mutational scanning  
362 experiments (C-E). A red dashed line indicates the limit of detection (each mAb was tested at a  
363 starting concentration of 16  $\mu\text{g}/\text{mL}$ ). Neutralization titers shown are the geometric mean, and  
364 error bars denote the geometric standard deviation of three independent experiments. Statistical  
365 analyses of differences between FRNT titers against WT and mutant viruses were done using a  
366 one-way ANOVA with Dunnett's test for multiple comparisons. \*,  $p < 0.05$

367

#### 368 **Figure 5: mAb 019-10117 3C06 Requires RBS Contacts for Cross-Reactivity**

369 ELISAs were completed using the 019-10117 3C06 mAb (A) and the 024-10128-3C04 mAb (B)  
370 and plates coated with A/Victoria/210/2009 (Vic/09) HA VLPs with only Y98F, only K160T, or  
371 Y98F and K160T. ELISA binding curves from experimental triplicates are shown with one site –  
372 specific binding curves fit to the data (GraphPad Prism). Dashed lines represent the 95%  
373 confidence interval for each curve fit.

374

#### 375 **Figure 6: Rare individuals have high levels of RBS-targeting antibodies in serum**

376 ELISAs were completed with serum from Donor 019-10117 with plates coated with  
377 A/Victoria/210/2009-WT HA (Vic/09 WT), A/Hong Kong/4801/2014-WT HA (HK/14 WT), and  
378 Y98F HA RBS mutants of both strains (Vic/09 Y98F, HK/14 Y98F). ELISAs were completed with  
379 serum collected prior to vaccination (day 0) (A) or day 21 following vaccination (B). Serum  
380 antibodies collected pre- and post-vaccination from 019-10117 exhibited reduced binding to  
381 A/Victoria/210/2009 HA with the Y98F substitution and the A/Hong Kong/4801/2014 HA with the  
382 Y98F substitution. Dashed lines represent the 95% confidence interval for each one site –  
383 specific binding curve fit.

384

385 **Figure 7: RBS Antibodies Contribute to Neutralizing Titers Against an Antigenically-**  
386 **Mismatched Strain**

387 (A) Absorption assays were completed with the 019-10117-3C06 (abbreviated 3C06) and 041-  
388 10047-1C04 (abbreviated 1C04) mAbs. The A/Hong Kong/4801/2014-WT HA depleted both  
389 mAbs, while absorption with A/Hong Kong/4801/2014-Y98F HA did not deplete the 019-10117  
390 3C06 mAb. Titers shown are the geometric mean of three independent experiments, and error  
391 bars show the geometric SD. (B) Residue differences between the HA of the 2015-2016 vaccine  
392 strain (A/Switzerland/9715293/2013) and circulating strain (A/Hong Kong/4801/2014) are shown  
393 in dark blue on the H3 structure. (C) Neutralization assays were completed with serum collected  
394 pre- and post-vaccination from individuals receiving the 2015-2016 seasonal influenza vaccine.  
395 Assays were completed with the vaccine strain (A/Switzerland/9715293/2013) and circulating  
396 strain (A/Hong Kong/4801/2014). Titers shown are the geometric mean of three independent  
397 experiments. Black lines indicate geometric mean and geometric 95% CI for each group, and  
398 statistical comparisons were made using the nonparametric Friedman test with correction for  
399 multiple comparisons. Statistically significant differences between groups are noted (\*,  $p < 0.05$ ).  
400 (D-G) Absorption assays were completed with serum from individuals pre- and post- vaccination  
401 and neutralization of the A/Hong Kong/4801-WT virus was measured using an FRNT assay.



402 Sera were absorbed with 293F cells expressing A/Hong Kong/4801-WT HA (WT), A/Hong  
403 Kong/4801 HA with a Y98F substitution (Y98F), or no HA (mock). Data are expressed as  
404 number of foci after absorbing a 1:80 dilution of each serum sample. Error bars show the mean  
405 number of foci +/- SD for three independent experiments. \*,  $p < 0.05$

406

## 407 **STAR METHODS**

### 408 **Monoclonal Antibody Isolation and Purification**

409 mAbs were isolated from human donors as previously described (Smith et al., 2009). Briefly,  
410 plasmablasts were single-cell sorted from peripheral blood mononuclear cells collected from  
411 donors seven days after vaccination with the 2010-2011 vaccine containing the H3N2 vaccine  
412 strain A/Victoria/210/2009. Single-cell RT-PCR was used to amplify  $V_H$  and  $V_L$  chains, which  
413 were cloned into human IgG expression vectors. mAbs were produced by transfecting 293T  
414 cells with plasmids encoding heavy and light chains and mAbs were purified using protein A/G  
415 magnetic beads.

416

### 417 **Hemagglutination-inhibition (HAI) Assays**

418 mAbs were serially diluted twofold in a 96-well round-bottom plate in 50 $\mu$ L total volume of  
419 phosphate-buffered saline (PBS). After serial dilution, four agglutinating doses of virus in a total  
420 volume of 50  $\mu$ L PBS were added to each well. Turkey erythrocytes (12.5  $\mu$ L of a 2.5% [vol/vol]  
421 solution) were added and the sera, virus, and erythrocytes were gently mixed. After 1 hr at room  
422 temperature, plates were scanned and titers were determined as the lowest concentration of  
423 monoclonal antibody that fully inhibited agglutination. HAI assays were performed in duplicate  
424 on separate days.

425

### 426 **Microneutralization (MN) Assays**

427 mAbs were serially diluted two-fold in round-bottom 96-well plates in 50 $\mu$ L serum-free Minimal  
428 Essential Medium (MEM). 50  $\mu$ L of MEM containing 100 TCID<sub>50</sub> of virus was added to serially  
429 diluted mAbs and the mAb-virus mixtures were incubated for 30 min at room temperature.  
430 Following incubation, the mAb-virus mixtures were added to confluent monolayers of Madin-  
431 Darby canine kidney (MDCK) cells in 96-well plates and incubated for 1 hr at 37°C. After  
432 incubation, the virus-antibody mixtures were removed and cells were washed with 180  $\mu$ L MEM.  
433 After washing, serial dilutions of each mAb were added back to cell monolayers in infection  
434 media (MEM containing HEPES buffer, gentamycin, and 1  $\mu$ g/mL TPCK-treated trypsin). The  
435 cells were incubated for 3 days and neutralization titers were determined as the lowest  
436 concentration of mAb that prevented cell death. MN assays were completed in duplicate on  
437 separate days.

438

#### 439 **VLP Antigenic Mapping ELISAs**

440 Point mutants of A/Victoria/210/2009 HA were generated in a codon-optimized HA gene by site  
441 directed mutagenesis. Virus-like particles (VLPs) were generated by transfecting 293T cells with  
442 each point mutant along with plasmids encoding HIV gag, the NA from A/Puerto Rico/8/1934,  
443 and a human-airway trypsin-like protease (HAT). Supernatants from transfected 293T cells were  
444 collected 3 days following transfection and were concentrated by centrifugation at 19,000 rpm  
445 (65,096 x g) in an SW-28 rotor using a 20% sucrose cushion. VLP pellets were resuspended in  
446 PBS and stored at 4°C. ELISA plates were coated with HA-normalized point-mutant VLPs  
447 diluted in PBS or just PBS as a background control and stored overnight at 4°C. The following  
448 day, plates were blocked with a 3% w/vol solution of bovine-serum albumin (BSA) in PBS for 2  
449 hrs. After blocking, plates were washed five times with distilled water and two-fold serial  
450 dilutions of each mAb were added to plates in a 1% w/vol solution of BSA in PBS. After 2 hrs of  
451 incubation, plates were washed and a peroxidase-conjugated goat anti-human secondary  
452 antibody was added in a 1% w/vol solution of BSA in PBS. After incubation for 1 hr, plates were

453 washed and 50 $\mu$ L of TMB substrate was added to each well. The TMB reaction was quenched  
454 by addition of 25  $\mu$ L 250mM HCl and absorbance at 450nm was measured using a plate reader.  
455 In order to generate antigenic maps, one-site specific binding curves were fit to the data in  
456 GraphPad Prism software and the maximal binding ( $B_{max}$ ) was determined for each mAb. To  
457 generate antigenic maps from the ELISA data, we first selected the lowest mAb concentration  
458 that still gave at least 90% of the  $B_{max}$  signal. At this dilution, background signal was subtracted  
459 and signal for each point mutant was normalized to the A/Victoria/210/2009 WT HA VLP signal.  
460 Antigenic mapping ELISAs were conducted for each mAb in duplicate on separate days, and  
461 the resulting values were averaged and represented as a heatmap.

462

### 463 **Recombinant HA Production**

464 Codon optimized HA genes for A/Hong Kong/4801/2014 WT and Y98F were cloned into  
465 expression vectors and the transmembrane was removed and replaced with the FoldOn  
466 trimerization domain from T4 fibrin, an AviTag site-specific biotinylation sequence, and a  
467 hexahistidine tag, as previously described (Whittle et al., 2014). Recombinant HAs were  
468 produced by transfecting 293F suspension cells with plasmids encoding HA. After four days, the  
469 supernatant was clarified by centrifugation and the HA proteins were purified by Ni-NTA affinity  
470 chromatography.

471

### 472 **Mutational Antigenic Profiling**

473 We performed mutational antigenic profiling of mAbs 024-10128-3C04 and 019-10117-3C06  
474 against A/Perth/16/2009 (H3N2) HA mutant virus libraries (Lee et al., 2018) using a previously  
475 described protocol (Doud et al., 2017). We selected two biological replicate libraries by  
476 incubating 1e6 TCID<sub>50</sub> mutant viruses with neutralizing concentrations of antibody at 37°C for  
477 1.5 hours. For antibody 024-10128-3C04, we neutralized mutant viruses with 0.1, 0.25, 0.2,  
478 0.65, or 1  $\mu$ g/ml antibody, and for 019-10117-3C06 we neutralized with 0.1, 0.2, 0.25, 0.55, 0.7,

479 or 1 ug/ml antibody. We also included a mock selection condition where virus library was  
480 incubated with Influenza Growth Media (IGM, consisting of Opti-MEM supplemented with 0.01%  
481 heat-inactivated FBS, 0.3% BSA, 100 U of penicillin per milliliter, 100 ug of streptomycin per  
482 milliliter, and 100 ug of calcium chloride per milliliter). Following antibody incubation, we infected  
483 2.5e5 MDCK-SIAT1-TMPRSS2 cells (Lee et al., 2018) with the virus-antibody mixture, then 2  
484 hours post-infection aspirated off the inoculum, washed the cells with 1 mL PBS, then replaced  
485 the media with fresh IGM. Approximately 15 hours post-infection, we extracted, reverse-  
486 transcribed, and PCR amplified the viral RNA. We used the barcoded-subamplicon sequencing  
487 approach described in Lee et al., 2018 to deep sequence at high-accuracy. We then used  
488 dms\_tools2 (v2.3.0) (Bloom, 2015) to analyze the deep sequencing results. The deep  
489 sequencing results are available on the NIH Sequence Read Archive under BioSample  
490 accessions SAMN10183083 (for the antibody-selected libraries) and SAMN10183146 (for the  
491 selection controls). The computer code for analyzing the data are at  
492 [https://github.com/jbloomlab/Perth2009-HA\\_mAb\\_MAP](https://github.com/jbloomlab/Perth2009-HA_mAb_MAP)

493

#### 494 **Human Subjects and Serum Collection**

495 All experiments involving humans were approved by the institutional review boards of the Wistar  
496 Institute, University of Pennsylvania, and the University of Chicago. Informed consent was  
497 obtained from all individuals. Experiments using deidentified human sera and mAbs were  
498 conducted at the University of Pennsylvania. For individuals from whom mAbs were isolated,  
499 serum was collected at the time of vaccination and 21 days post-vaccination. For individuals  
500 from the 2015-16 vaccination cohort, serum samples were collected at the time of vaccination  
501 and four weeks post-vaccination. For assays using foci-reduction neutralization tests, serum  
502 were treated with receptor-destroying enzyme (RDE) for 2 hrs at 37°C. Following treatment, the  
503 enzyme was heat-inactivated by incubation at 55°C.

504

505 **ELISAs with human sera**

506 ELISA plates were coated the day prior with 0.5 µg/mL recombinant HAs (A/Hong  
507 Kong/4801/2014 WT, A/Hong Kong/4801/2014 Y98F, or a PBS background control) and  
508 blocked for 2 hrs on the day of the experiment with a 3% BSA in PBS solution. After washing  
509 the plates three times with wash buffer containing 0.5% Tween20 (vol/vol) in PBS (PBS-T),  
510 serially diluted serum samples were added to the ELISA plates and incubated for 2 hrs. After  
511 incubation, plates were washed three times with PBS-T and a peroxidase-conjugated goat anti-  
512 human secondary antibody diluted in 1% BSA in PBS was added. After 1 hr of incubation with  
513 the secondary antibody, plates were washed three times with PBS-T and 50 µL of a TMB  
514 substrate was added to each well. 25 µL of 250mM HCl was used to quench the reaction and  
515 the absorbance at 450nm was measured using a plate reader. Background signal at each  
516 dilution was subtracted for each serum sample and one site – specific binding curves were fit to  
517 the data using GraphPad Prism. Human sera ELISAs were performed in triplicate on separate  
518 days.

519

520 **Competition ELISAs**

521 ELISA plates were coated the day prior with BPL-inactivated A/Hong Kong/1/1968 and blocked  
522 for 2 hrs with a 3% BSA in PBS solution. After washing the plates five times with distilled water,  
523 serial dilutions of the anti-H3 mouse mAb F49 or the control mouse mAb C179 in 1% BSA in  
524 PBS were added to the plate and incubated for 2 hrs at RT. After incubation, human mAbs were  
525 added directly to the plates at a fixed concentration in 1% BSA in PBS and incubated for 1 hr at  
526 RT. Plates were then washed five times with distilled water and peroxidase-conjugated anti-  
527 human secondary antibody was added and incubated for 1 hr. Following incubation with  
528 secondary antibodies, plates were washed five times with distilled water, TMB substrate was  
529 added, and the reaction was quenched with HCl. The absorbance at 450nm was quantified  
530 using a plate reader and competition at each dilution was normalized to the control mAb C179.

531

### 532 **Foci-Reduction Neutralization Tests (FRNTs)**

533 RDE-treated serum samples were serially diluted in 96-well plates in a total volume of 50  $\mu$ L.  
534 Approximately 200-300 focus-forming units of A/Hong Kong/4801/2014 WT virus in 50  $\mu$ L were  
535 added to each well and the virus-absorbed sera mixture was incubated for 1 hr at room  
536 temperature. After incubation, the virus-sera mixture was added to confluent monolayers of  
537 MDCK-SIAT1 cells and incubated for 1 hr at 37°C. After incubation, cell monolayers were  
538 washed with 180 $\mu$ L serum-free MEM and an overlay medium containing HEPES, gentamycin,  
539 and 0.5% methylcellulose was added. The cell monolayers were incubated for 18 hrs, after  
540 which the overlay was removed and the cells were fixed at 4°C for 2 hrs using an aqueous  
541 solution of 4% paraformaldehyde (vol/vol). After fixation, cell monolayers were permeabilized  
542 using 0.5% Triton-X100 in PBS (vol/vol). After fixation and permeabilization, monolayers were  
543 blocked with a solution of 5% fat-free milk in PBS for 1 hr. After blocking, a mouse anti-  
544 nucleoprotein antibody was added in 5% milk/PBS for 1 hr. After the primary incubation, a  
545 peroxidase-conjugated goat anti-mouse secondary antibody in 5% milk/PBS was added for 1 hr.  
546 After incubation with the secondary antibody, monolayers were stained using a TMB substrate  
547 and foci were imaged and quantified using an ELISpot reader. For staining, plates were washed  
548 with distilled water between each step. Percentage of infection was determined relative to wells  
549 that did receive any serum or antibody. FRNT90 titer values are reported are the concentration  
550 of serum or mAb that reduced the numbers of foci by at least 90%.

551

### 552 **Absorption-Neutralization and Absorption-ELISA Assays**

553 Two days prior to experiments, 293F suspension cells were transfected using 293fectin with  
554 plasmids expressing A/Hong Kong/4801/2014 WT HA, A/Hong Kong/4801/2014 Y98F HA, or a  
555 mock transfection control containing no plasmid or transfection reagent. On the day of the  
556 experiment, transfected cells were pelleted by centrifugation, washed twice with 293F media,

557 and resuspended at the desired volume. In the case of absorption-neutralization assays, RDE-  
558 treated serum samples were diluted in 293F media at a dilution of 1:80 and split into three  
559 fractions for the three absorption conditions. An equivalent volume of 293F media containing  
560 approximately  $8 \times 10^6$  transfected cells/absorption reaction were added to each diluted serum  
561 sample and the samples were mixed by shaking for 1 hr at room temperature. After incubation,  
562 the cells were pelleted by centrifugation and the supernatant was transferred and re-centrifuged  
563 to clarify. Absorbed supernatant containing the sera was then serially diluted in 96-well round-  
564 bottom plates in serum-free MEM and FRNT assays were conducted as described. Absorption-  
565 neutralization experiments were completed in triplicate on separate days. In the case of  
566 absorption-ELISA assays, serum samples were diluted in 293F media at an initial dilution of  
567 1:50 and split into three fractions for the three absorption conditions. Transfected cells were  
568 added and absorption of serum antibodies was carried out as described above. Following  
569 absorption, absorbed serum samples were serially diluted at a starting dilution of 1:500  
570 (factoring in absorption volume) in 1% BSA w/vol in PBS and ELISAs were performed as  
571 described above.

572 For ELISA data, background antibody binding for each sample at each dilution was subtracted  
573 and one-site specific binding curves were fit to the data using GraphPad Prism software. The  
574 area under the curve (AUC) was calculated for each curve. For neutralization data, foci in  
575 positive control wells which did not receive any serum or antibody were used to adjust for  
576 variation between plates. Neutralization data are expressed as the number of foci remaining  
577 after absorbing a 1:80 dilution of serum. Assays were performed in triplicate on separate days.

578 For both absorption-neutralization and absorption-ELISA experiments, the RBS mAb 019-10117  
579 3C06 mAb and the 041-10047 1C04 mAb (which targets the lower HA head region) were initially  
580 diluted to a concentration of 32  $\mu\text{g}/\text{mL}$  in 293F media prior to the addition of cells. For  
581 absorption-neutralization experiments, the starting concentration for each mAb absorption

582 condition in the FRNT was 16 µg/mL. For absorption-ELISA experiments, the starting  
583 concentration for each mAb absorption condition in the ELISA was 3.2 µg/mL.

584

### 585 **Quantification and Statistical Analysis**

586 Titer values for neutralization and ELISA experiments are reported as geometric mean and  
587 geometric SD, geometric mean and geometric 95% CI, or mean +/- SD as noted in each figure  
588 legend. For statistical analysis, the statistical tests used and the significance thresholds are  
589 described in the legend of each figure. All statistical analysis was performed in GraphPad Prism  
590 software.

591

592

593



594 **REFERENCES**

- 595 Amit, A.G., Mariuzza, R.A., Phillips, S.E., and Poljak, R.J. (1986). Three-dimensional  
596 structure of an antigen-antibody complex at 2.8 Å resolution. *Science* 233, 747-753.
- 597 Angeletti, D., and Yewdell, J.W. (2018). Understanding and Manipulating Viral Immunity:  
598 Antibody Immunodominance Enters Center Stage. *Trends Immunol* 39, 549-561.
- 599 Bloom, J.D. (2015). Software for the analysis and visualization of deep mutational  
600 scanning data. *BMC Bioinformatics* 16, 168.
- 601 Bonsignori, M., Liao, H.-X.X., Gao, F., Williams, W.B., Alam, S.M., Montefiori, D.C., and  
602 Haynes, B.F. (2017). Antibody-virus co-evolution in HIV infection: paths for HIV vaccine  
603 development. *Immunological reviews* 275, 145-160.
- 604 Bradley, K.C., Galloway, S.E., Lasanajak, Y., Song, X., Heimbürg-Molinaro, J., Yu, H.,  
605 Chen, X., Talekar, G.R., Smith, D.F., Cummings, R.D., *et al.* (2011). Analysis of  
606 influenza virus hemagglutinin receptor binding mutants with limited receptor recognition  
607 properties and conditional replication characteristics. *Journal of virology* 85, 12387-  
608 12398.
- 609 Chambers, B.S., Parkhouse, K., Ross, T.M., Alby, K., and Hensley, S.E. (2015).  
610 Identification of Hemagglutinin Residues Responsible for H3N2 Antigenic Drift during the  
611 2014-2015 Influenza Season. *Cell reports* 12, 1-6.
- 612 Doud, M.B., Hensley, S.E., and Bloom, J.D. (2017). Complete mapping of viral escape  
613 from neutralizing antibodies. *PLoS pathogens* 13, e1006271.
- 614 Doud, M.B., Lee, J.M., and Bloom, J.D. (2018). How single mutations affect viral escape  
615 from broad and narrow antibodies to H1 influenza hemagglutinin. *Nature*  
616 *communications* 9, 1386.
- 617 Ekiert, D.C., Kashyap, A.K., Steel, J., Rubrum, A., Bhabha, G., Khayat, R., Lee, J.H.,  
618 Dillon, M.A., O'Neil, R.E., Faynboym, A.M., *et al.* (2012). Cross-neutralization of  
619 influenza A viruses mediated by a single antibody loop. *Nature* 489, 526-532.

620 Erbeding, E.J., Post, D., Stemmy, E., Roberts, P.C., Augustine, A.D., Ferguson, S.,  
621 Paules, C.I., Graham, B.S., and Fauci, A.S. (2018). A Universal Influenza Vaccine: The  
622 Strategic Plan for the National Institute of Allergy and Infectious Diseases. *The Journal*  
623 *of infectious diseases*.

624 Giles, B.M., and Ross, T.M. (2011). A computationally optimized broadly reactive  
625 antigen (COBRA) based H5N1 VLP vaccine elicits broadly reactive antibodies in mice  
626 and ferrets. *Vaccine* 29, 3043-3054.

627 Grohskopf, L.A., Sokolow, L.Z., and ... Recommendations ..., B.-K.R. (2018). Prevention  
628 and Control of Seasonal Influenza with Vaccines: Recommendations of the Advisory  
629 Committee on Immunization Practices—United States, 2018 ... Recommendations ....

630 Hadfield, J., Megill, C., Bell, S.M., Huddleston, J., Potter, B., Callender, C., Sagulenko,  
631 P., Bedford, T., and Neher, R.A. (2018). Nextstrain: real-time tracking of pathogen  
632 evolution. *Bioinformatics* 34, 4121-4123.

633 Impagliazzo, A., Milder, F., Kuipers, H., Wagner, M.V., Zhu, X., Hoffman, R.M.B., van  
634 Meersbergen, R., Huizingh, J., Wanningen, P., Verspuij, J., *et al.* (2015). A stable  
635 trimeric influenza hemagglutinin stem as a broadly protective immunogen. *Science* 349,  
636 1301-1306.

637 Kanekiyo, M., Joyce, M.G., Gillespie, R.A., Gallagher, J.R., Andrews, S.F., Yassine,  
638 H.M., Wheatley, A.K., Fisher, B.E., Ambrozak, D.R., Creanga, A., *et al.* (2019). Mosaic  
639 nanoparticle display of diverse influenza virus hemagglutinins elicits broad B cell  
640 responses. *Nat Immunol.*

641 Knossow, M., and Skehel, J.J. (2006). Variation and infectivity neutralization in influenza.  
642 *Immunology* 119, 1-7.

643 Koel, B.F., Burke, D.F., Bestebroer, T.M., van der Vliet, S., Zondag, G.C., Vervaet, G.,  
644 Skepner, E., Lewis, N.S., Spronken, M.I., Russell, C.A., *et al.* (2013). Substitutions near

645 the receptor binding site determine major antigenic change during influenza virus  
646 evolution. *Science* 342, 976-979.

647 Krammer, F., Pica, N., Hai, R., Margine, I., and Palese, P. (2013). Chimeric  
648 Hemagglutinin Influenza Virus Vaccine Constructs Elicit Broadly Protective Stalk-  
649 Specific Antibodies. *Journal of Virology* 87, 6542-6550.

650 Krause, J.C., Tsibane, T., Tumpey, T.M., Huffman, C.J., Basler, C.F., and Crowe, J.E.  
651 (2011). A broadly neutralizing human monoclonal antibody that recognizes a conserved,  
652 novel epitope on the globular head of the influenza H1N1 virus hemagglutinin. *Journal of*  
653 *virology* 85, 10905-10908.

654 Landais, E., Murrell, B., Briney, B., Murrell, S., Rantalainen, K., Berndsen, Z.T., Ramos,  
655 A., Wickramasinghe, L., Smith, M.L., Eren, K., *et al.* (2017). HIV Envelope Glycoform  
656 Heterogeneity and Localized Diversity Govern the Initiation and Maturation of a V2 Apex  
657 Broadly Neutralizing Antibody Lineage. *Immunity* 47, 990.

658 Lee, J.M., Huddleston, J., Doud, M.B., Hooper, K.A., Wu, N.C., Bedford, T., and Bloom,  
659 J.D. (2018). Deep mutational scanning of hemagglutinin helps predict evolutionary fates  
660 of human H3N2 influenza variants. *Proceedings of the National Academy of Sciences of*  
661 *the United States of America*.

662 Lee, P.S., Ohshima, N., Stanfield, R.L., Yu, W., Iba, Y., Okuno, Y., Kurosawa, Y., and  
663 Wilson, I.A. (2014). Receptor mimicry by antibody F045-092 facilitates universal binding  
664 to the H3 subtype of influenza virus. *Nat Commun* 5, 3614.

665 Lee, P.S., Yoshida, R., Ekiert, D.C., Sakai, N., Suzuki, Y., Takada, A., and Wilson, I.A.  
666 (2012). Heterosubtypic antibody recognition of the influenza virus hemagglutinin receptor  
667 binding site enhanced by avidity. *Proc Natl Acad Sci U S A* 109, 17040-17045.

668 Martín, J., Wharton, S.A., Lin, Y.P., Takemoto, D.K., Skehel, J.J., Wiley, D.C., and  
669 Steinhauer, D.A. (1998). Studies of the binding properties of influenza hemagglutinin  
670 receptor-site mutants. *Virology* 241, 101-111.

671 McCarthy, K.R., Watanabe, A., Kuraoka, M., Do, K.T., McGee, C.E., Sempowski, G.D.,  
672 Kepler, T.B., Schmidt, A.G., Kelsoe, G., and Harrison, S.C. (2018). Memory B Cells that  
673 Cross-React with Group 1 and Group 2 Influenza A Viruses Are Abundant in Adult  
674 Human Repertoires. *Immunity* 48, 174.

675 Popova, L., Smith, K., West, A.H., Wilson, P.C., James, J.A., Thompson, L.F., and Air,  
676 G.M. (2012). doi.org/10.1101/675272; this version posted June 19, 2019. The copyright holder for this preprint (which was not  
677 Recent H3N2 Influenza Viruses. *PLoS ONE* 7.

678 Rantalainen, K., Berndsen, Z.T., Murrell, S., Cao, L., Omorodion, O., Torres, J.L., Wu,  
679 M., Umotoy, J., Copps, J., Pognard, P., *et al.* (2018). Co-evolution of HIV Envelope and  
680 Apex-Targeting Neutralizing Antibody Lineage Provides Benchmarks for Vaccine  
681 Design. *Cell reports* 23, 3249-3261.

682 Schmidt, A.G., Do, K.T., McCarthy, K.R., Kepler, T.B., Liao, H.-X.X., Moody, M.A.,  
683 Haynes, B.F., and Harrison, S.C. (2015a). Immunogenic Stimulus for Germline  
684 Precursors of Antibodies that Engage the Influenza Hemagglutinin Receptor-Binding  
685 Site. *Cell reports* 13, 2842-2850.

686 Schmidt, A.G., Therkelsen, M.D., Stewart, S., Kepler, T.B., Liao, H.-X.X., Moody, M.A.,  
687 Haynes, B.F., and Harrison, S.C. (2015b). Viral receptor-binding site antibodies with  
688 diverse germline origins. *Cell* 161, 1026-1034.

689 Smith, K., Garman, L., Wrammert, J., Zheng, N.-Y.Y., Capra, J.D., Ahmed, R., and  
690 Wilson, P.C. (2009). Rapid generation of fully human monoclonal antibodies specific to a  
691 vaccinating antigen. *Nature protocols* 4, 372-384.

692 Tsibane, T., Ekiert, D.C., Krause, J.C., Martinez, O., Crowe, J.E., Jr., Wilson, I.A., and  
693 Basler, C.F. (2012). Influenza Human Monoclonal Antibody 1F1 Interacts with Three  
694 Major Antigenic Sites and Residues Mediating Human Receptor Specificity in H1N1  
695 Viruses. *PLoS pathogens* 8, e1003067.

696 Weis, W., Brown, J.H., Cusack, S., Paulson, J.C., Skehel, J.J., and Wiley, D.C. (1988).  
697 Structure of the influenza virus haemagglutinin complexed with its receptor, sialic acid.  
698 Nature 333, 426-431.

699 Whittle, J.R.R., Wheatley, A.K., Wu, L., Lingwood, D., Kanekiyo, M., Ma, S.S., Narpala,  
700 S.R., Yassine, H.M., Frank, G.M., Yewdell, J.W., *et al.* (2014). Flow cytometry reveals  
701 that H5N1 vaccination elicits cross-reactive stem-directed antibodies from multiple Ig  
702 heavy-chain lineages. *Journal of virology* 88, 4047-4057.

703 Whittle, J.R.R., Zhang, R., Khurana, S., King, L.R., Manischewitz, J., Golding, H.,  
704 Dormitzer, P.R., Haynes, B.F., Walter, E.B., Moody, M.A., *et al.* (2011). Broadly  
705 neutralizing human antibody that recognizes the receptor-binding pocket of influenza  
706 virus hemagglutinin. *Proceedings of the National Academy of Sciences of the United*  
707 *States of America* 108, 14216-14221.

708 Wiley, D.C., Wilson, I.A., and Skehel, J.J. (1981). Structural identification of the  
709 antibody-binding sites of Hong Kong influenza haemagglutinin and their involvement in  
710 antigenic variation. *Nature* 289, 373-378.

711 Winarski, K.L., Thornburg, N.J., Yu, Y., Sapparapu, G., Crowe, J.E., Jr., and Spiller,  
712 B.W. (2015). Vaccine-elicited antibody that neutralizes H5N1 influenza and variants  
713 binds the receptor site and polymorphic sites. *Proc Natl Acad Sci U S A* 112, 9346-9351.

714 Wu, N.C., Zost, S.J., Thompson, A.J., Oyen, D., Nycholat, C.M., McBride, R., Paulson,  
715 J.C., Hensley, S.E., and Wilson, I.A. (2017). A structural explanation for the low  
716 effectiveness of the seasonal influenza H3N2 vaccine. *PLoS pathogens* 13.

717 Xu, R., Krause, J.C., McBride, R., Paulson, J.C., Crowe, J.E., and Wilson, I.A. (2013). A  
718 recurring motif for antibody recognition of the receptor-binding site of influenza  
719 hemagglutinin. *Nature structural & molecular biology* 20, 363-370.

720 Yassine, H.M., Boyington, J.C., McTamney, P.M., Wei, C.-J.J., Kanekiyo, M., Kong, W.-  
721 P.P., Gallagher, J.R., Wang, L., Zhang, Y., Joyce, M.G., *et al.* (2015). Hemagglutinin-

722 stem nanoparticles generate heterosubtypic influenza protection. *Nature medicine* 21,  
723 1065-1070.

724 Yewdell, J.W. (2011). Viva la revolución: rethinking influenza a virus antigenic drift.  
725 *Current opinion in virology* 1, 177-183.

726 Zost, S.J., Parkhouse, K., Gumina, M.E., Kim, K., Diaz Perez, S., Wilson, P.C., Treanor,  
727 J.J., Sant, A.J., Cobey, S., and Hensley, S.E. (2017). Contemporary H3N2 influenza  
728 viruses have a glycosylation site that alters binding of antibodies elicited by egg-adapted  
729 vaccine strains. *Proceedings of the National Academy of Sciences of the United States*  
730 *of America* 114, 12578-12583.

731

# Zost et al. Figure 1

## A HAI against A/Victoria/210/2009

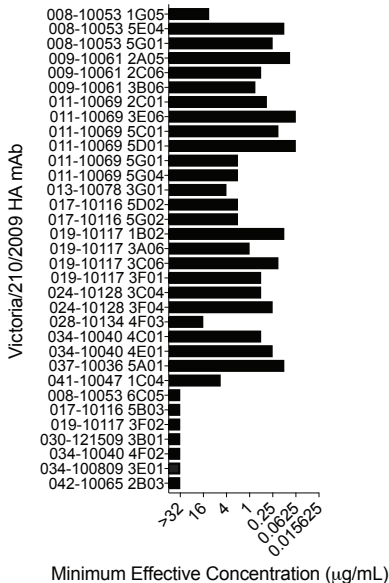

## B MN against A/Victoria/210/2009

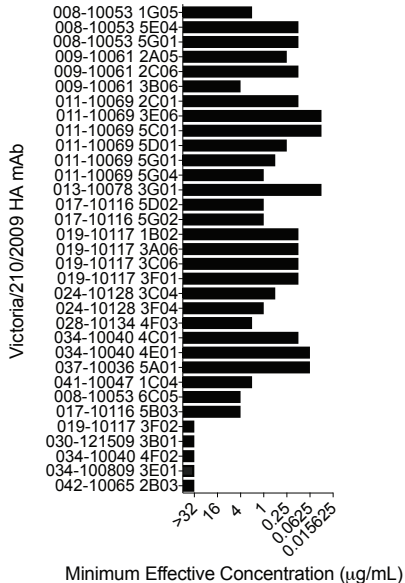





## Zost et al. Figure 3

## H3N2 HAs

|                | 1968            | 1974 | 1985  | 1994 | 2005  | 2009 | 2012 | 2013 | 2014 | H1   |       |
|----------------|-----------------|------|-------|------|-------|------|------|------|------|------|-------|
| HAI+ mAbs      | 008-10053 1G05  | 0.09 | 0.02  | 1.32 | 0.75  | 0.72 | 1.00 | 1.02 | 0.91 | 1.07 | 0.00  |
|                | 008-10053 5E04  | 0.01 | 0.00  | 1.10 | 0.58  | 0.72 | 1.00 | 0.97 | 0.02 | 0.03 | 0.00  |
|                | 008-10053 5G01  | 0.03 | 0.02  | 1.14 | 0.64  | 0.78 | 1.00 | 0.94 | 0.02 | 0.03 | 0.01  |
|                | 009-10061 2A05  | 0.02 | 0.01  | 0.02 | 0.41  | 0.53 | 1.00 | 0.96 | 0.02 | 0.01 | 0.00  |
|                | 009-10061 2C06  | 0.01 | 0.00  | 0.02 | 0.00  | 0.77 | 1.00 | 0.95 | 0.03 | 0.01 | 0.00  |
|                | 009-10061 3B06  | 0.02 | 0.00  | 0.15 | 0.23  | 0.70 | 1.00 | 0.89 | 0.03 | 0.77 | 0.01  |
|                | 011-10069 2C01  | 0.02 | 0.01  | 0.03 | 0.00  | 0.72 | 1.00 | 0.94 | 0.10 | 0.01 | 0.01  |
|                | 011-10069 3E06  | 0.02 | 0.00  | 0.03 | 0.00  | 0.73 | 1.00 | 0.95 | 0.07 | 0.01 | 0.00  |
|                | 011-10069 5C01  | 0.01 | 0.00  | 0.02 | 0.00  | 0.79 | 1.00 | 0.98 | 0.01 | 0.00 | 0.00  |
|                | 011-10069 5D01  | 0.03 | 0.01  | 0.04 | 0.01  | 0.82 | 1.00 | 1.01 | 0.06 | 0.01 | 0.01  |
|                | 011-10069 5G01  | 0.00 | 0.03  | 0.01 | -0.02 | 0.82 | 1.00 | 0.87 | 0.86 | 0.49 | -0.01 |
|                | 011-10069 5G04  | 0.03 | 0.02  | 0.03 | 0.01  | 0.82 | 1.00 | 0.94 | 0.91 | 0.65 | 0.00  |
|                | 013-10078 3G01  | 0.07 | 0.04  | 0.08 | 0.02  | 0.86 | 1.00 | 0.93 | 0.06 | 0.03 | 0.04  |
|                | 017-10116 5D02  | 1.04 | 0.01  | 0.03 | 0.01  | 0.41 | 1.00 | 0.36 | 0.02 | 0.01 | 0.01  |
|                | 017-10116 5G02  | 0.73 | 0.00  | 0.03 | 0.00  | 0.08 | 1.00 | 0.22 | 0.02 | 0.00 | 0.01  |
|                | 019-10117 1B02  | 0.03 | 0.01  | 0.02 | 0.29  | 0.72 | 1.00 | 0.96 | 0.31 | 0.00 | 0.00  |
|                | 019-10117 3A06  | 0.01 | -0.01 | 0.02 | 0.11  | 0.76 | 1.00 | 0.95 | 0.01 | 0.08 | 0.00  |
|                | 019-10117 3C06  | 0.25 | 0.29  | 1.18 | 0.69  | 0.78 | 1.00 | 0.95 | 0.90 | 0.82 | 0.01  |
|                | 019-10117 3F01  | 0.03 | 0.02  | 0.05 | 0.22  | 0.78 | 1.00 | 0.98 | 0.53 | 0.01 | 0.00  |
|                | 024-10128 3C04  | 0.02 | 0.00  | 0.03 | 0.00  | 0.77 | 1.00 | 0.95 | 0.17 | 0.05 | 0.01  |
|                | 024-10128 3F04  | 0.02 | 0.01  | 0.04 | 0.39  | 0.74 | 1.00 | 1.00 | 1.09 | 0.06 | -0.01 |
|                | 028-10134 4F03  | 0.85 | 0.71  | 1.44 | 0.69  | 0.73 | 1.00 | 1.06 | 1.12 | 1.09 | 0.02  |
|                | 034-10040 4C01  | 0.02 | 0.01  | 0.03 | 0.01  | 0.83 | 1.00 | 0.98 | 0.27 | 0.32 | 0.01  |
|                | 034-10040 4E01  | 0.02 | 0.01  | 0.02 | 0.00  | 0.77 | 1.00 | 0.96 | 0.15 | 0.00 | 0.00  |
| 037-10036 5A01 | 0.02            | 0.01 | 0.04  | 0.00 | 0.87  | 1.00 | 1.00 | 0.99 | 0.18 | 0.01 |       |
| 041-10047 1C04 | 0.02            | 0.01 | 0.75  | 0.70 | 0.75  | 1.00 | 0.99 | 0.93 | 1.05 | 0.01 |       |
| HAI- mAbs      | 008-10053 6C05  | 0.55 | 0.64  | 1.60 | 0.24  | 0.27 | 1.00 | 0.90 | 0.98 | 1.19 | 0.00  |
|                | 017-10116 5B03  | 0.74 | 0.71  | 1.38 | 0.44  | 0.42 | 1.00 | 0.92 | 0.99 | 1.18 | 0.00  |
|                | 019-10117 3F02  | 0.96 | 0.87  | 0.93 | 0.70  | 0.92 | 1.00 | 1.13 | 1.00 | 2.27 | 0.61  |
|                | 030-121509 3B01 | 0.88 | 0.87  | 1.31 | 0.91  | 1.20 | 1.00 | 1.02 | 1.06 | 1.44 | 1.14  |
|                | 034-10040 4F02  | 1.13 | 1.11  | 1.47 | 0.69  | 0.88 | 1.00 | 0.02 | 0.02 | 0.06 | 0.01  |
|                | 034-100809 3E01 | 0.85 | 0.89  | 1.47 | 0.77  | 0.95 | 1.00 | 0.51 | 0.46 | 0.35 | -0.01 |
|                | 042-10065 2B03  | 0.98 | 0.90  | 1.33 | 0.64  | 0.77 | 1.00 | 0.96 | 0.91 | 1.24 | 0.00  |

# Zost et al. Figure 4

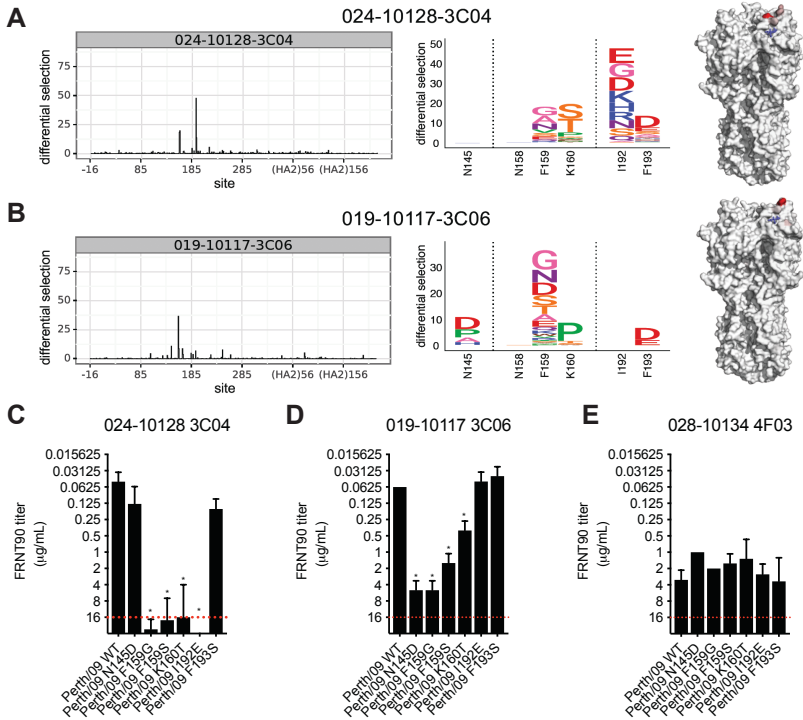

# Zost et al. Figure 5

**A**

019-10117 3C06

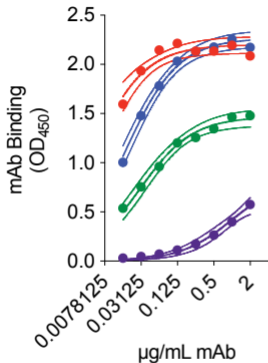**B**

024-10128 3C04

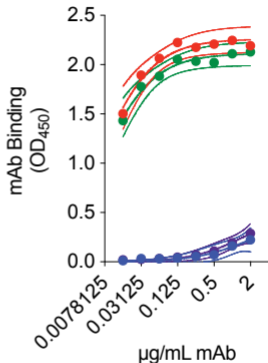

- Vic/09 WT
- Vic/09 Y98F
- Vic/09 K160T
- Vic/09 Y98F K160T

# Zost et al. Figure 6

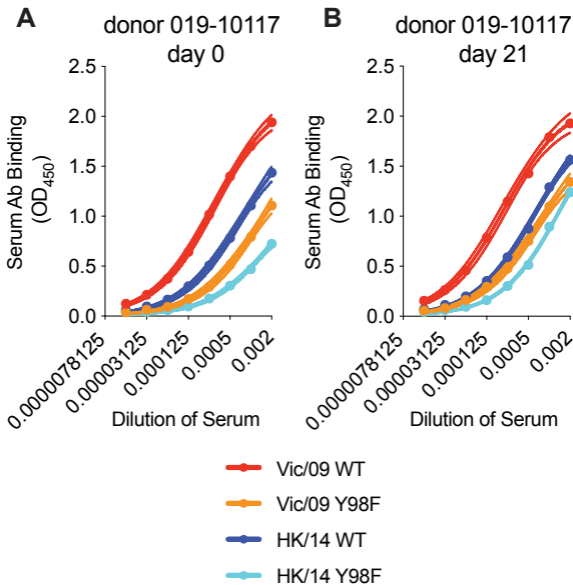

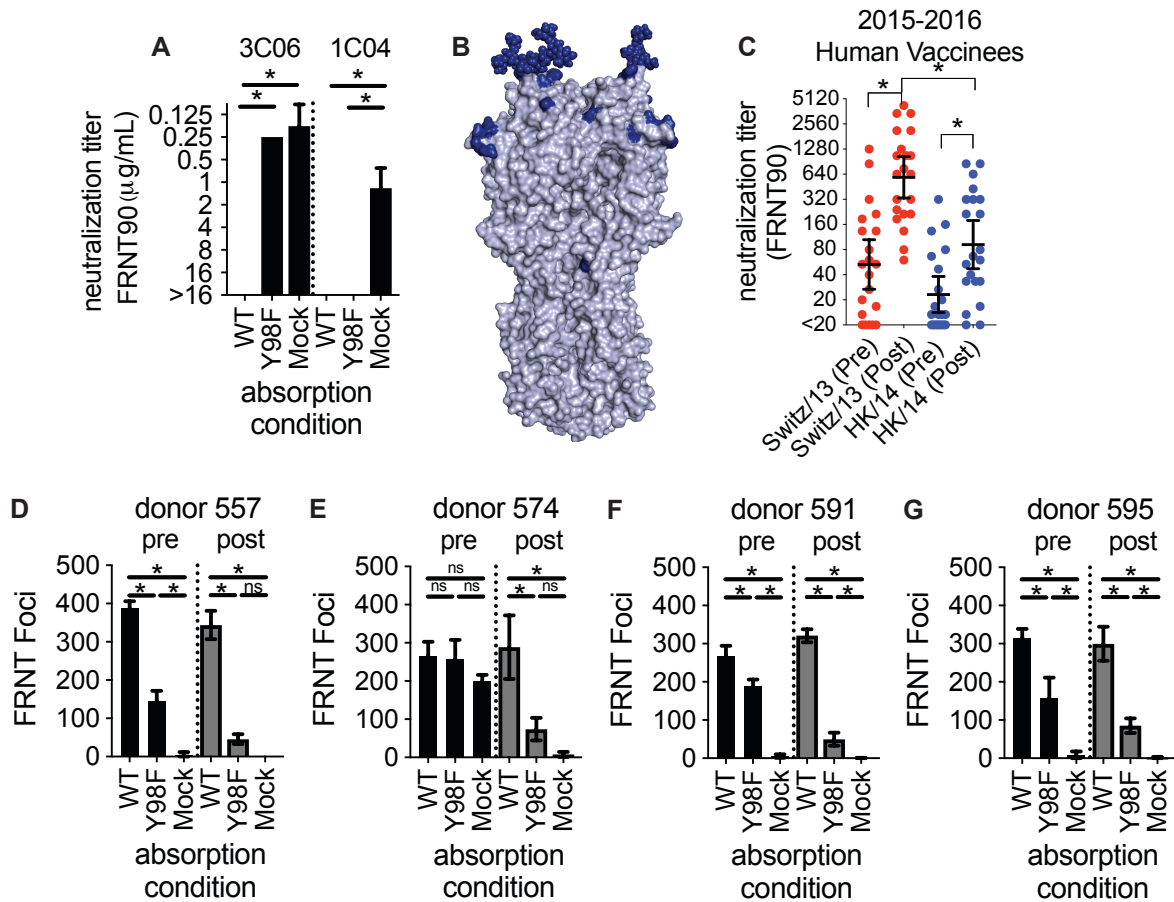

Source: https://www.biorxiv.org/content/10.1101/675272v1.full.pdf
